# Supplementary material for: Soil polluted system shapes endophytic fungi communities associated with Arundo donax: a field experiment
Source: PeerJ. 2025 Jan 10;13:e18789. doi: 10.7717/peerj.18789 (PMC11727649; doi:10.7717/peerj.18789)
Supplement: Supplemental Information 1 [file peerj-13-18789-s001.xlsx]

## Sheet: Sheet1
Treat	replication	pH	Na (%)	K (%)	SOC (%)	TN (g/kg)	TP (g/kg)	Al (g/kg)	Fe (g/kg)	As (mg/kg)	Cd (mg/kg)	Pb (mg/kg)
UP	1	7.14	0.0343333	0.0195	1.561	8.26	0.45	82.77	95.24	1.9	0.0021	0.38
	2	6.82333	0.00233333	0.019	1.468	8.26	0.46	82.43	96.96	2.82	0.0003	0.38
	3	6.5	0.005	0.019	1.641	8.27	0.45	82.26	92.42	1.92	0.0002	0.35
MP	1	7.49333	0.00333333	0.07275	0.974	6.08	0.58	51.5	35.54	7.69	0.0071	10.83
	2	7.30667	0.004	0.073	0.654	6.04	0.6	52.48	35.67	8.02	0.0072	9.47
	3	6.40667	0.00533333	0.07675	1.134	6.05	0.61	56.14	35.2	8.02	0.0079	10.4
RM	1	10.1267	0.187	0.008	0.32	3.97	0.45	173.2	309.5	0.28	0.0039	1.3
	2	10.1533	0.212667	0.009	0.28	3.97	0.48	180.63	283.7	0.28	0.0041	1.37
	3	10.17	0.208	0.013	0.427	3.98	0.49	172.04	307.31	0.27	0.0042	1.32
